# Supplementary material for: FCGR3B copy number variation is associated with susceptibility to systemic, but not organ-specific, autoimmunity
Source: Springer Nature journal article supplement (doi:10.1038/ng2046), 2007-05-21
Supplement: ng2046-S4.pdf [file ng2046-S4.pdf]

**Supplementary Table 2.** Primers sequences.

| <b>Gene name</b> | <b>Forward primer (5'-3')</b> | <b>Reverse primer (5'-3')</b> |
|------------------|-------------------------------|-------------------------------|
| <i>FCGR3B</i>    | CACCTTGAATCTCATCCCCAGGGTCTTG  | CCATCTCTGTCACCTGCCAG          |
| <i>FOXP2</i>     | TGACATGCCAGCTTATCTGTTT        | GAGAAAAGCAATTTTCACAGTCC       |
